# Supplementary material
Source: publisher figshare collection journal article supplement (https://f1000.figshare.com/ndownloader/files/1875614)
Supplement: Supplementary file 1 [file 1875614]

Bee	Group	Learning_block	Correct_all	False_all	Correct_T_dorsal	False_T_dorsal	Correct_T_ventral	False_T_ventral
D1	dorsal	B1	1	4	0	3	1	1
D1	dorsal	B2	0	5	0	3	0	2
D1	dorsal	B3	1	4	0	2	1	2
D1	dorsal	B4	3	2	0	2	3	0
D2	dorsal	B1	2	3	1	1	1	2
D2	dorsal	B2	1	4	1	3	0	1
D2	dorsal	B3	3	2	0	2	3	0
D2	dorsal	B4	3	2	0	2	3	0
D3	dorsal	B1	3	2	1	2	2	0
D3	dorsal	B2	2	3	0	2	2	1
D3	dorsal	B3	4	1	2	1	2	0
D3	dorsal	B4	3	2	1	1	2	1
D4	dorsal	B1	4	1	1	1	3	0
D4	dorsal	B2	3	2	0	2	3	0
D4	dorsal	B3	2	3	0	3	2	0
D4	dorsal	B4	3	2	1	2	2	0
D5	dorsal	B1	1	4	1	2	0	2
D5	dorsal	B2	3	2	0	2	3	0
D5	dorsal	B3	5	0	2	0	3	0
D5	dorsal	B4	3	2	3	0	0	2
D6	dorsal	B1	3	2	0	2	3	0
D6	dorsal	B2	3	2	0	2	3	0
D6	dorsal	B3	1	4	0	4	1	0
D6	dorsal	B4	3	2	0	2	3	0
D7	dorsal	B1	4	1	3	0	1	1
D7	dorsal	B2	2	3	0	2	2	1
D7	dorsal	B3	4	1	2	0	2	1
D7	dorsal	B4	3	2	2	1	1	1
D8	dorsal	B1	3	2	1	2	2	0
D8	dorsal	B2	2	3	0	2	2	1
D8	dorsal	B3	3	2	0	2	3	0
D8	dorsal	B4	5	0	3	0	2	0
D9	dorsal	B1	3	2	1	2	2	0
D9	dorsal	B2	4	1	1	1	3	0
D9	dorsal	B3	2	3	0	3	2	0
D9	dorsal	B4	3	2	0	2	3	0
V1	ventral	B1	3	2	1	2	2	0
V1	ventral	B2	2	3	1	2	1	1
V1	ventral	B3	5	0	2	0	3	0
V1	ventral	B4	2	3	0	2	2	1
V2	ventral	B1	5	0	2	0	3	0
V2	ventral	B2	1	4	1	3	0	1
V2	ventral	B3	3	2	0	2	3	0
V2	ventral	B4	3	2	0	2	3	0
V3	ventral	B1	3	2	2	1	1	1
V3	ventral	B2	3	2	0	2	3	0
V3	ventral	B3	2	3	0	3	2	0
V3	ventral	B4	3	2	0	2	3	0
V4	ventral	B1	1	4	0	2	1	2
V4	ventral	B2	4	1	1	1	3	0
V4	ventral	B3	3	2	1	2	2	0
V4	ventral	B4	3	2	1	2	2	0
V5	ventral	B1	1	4	0	3	1	1
V5	ventral	B2	3	2	0	2	3	0
V5	ventral	B3	2	3	0	2	2	1
V5	ventral	B4	2	3	1	2	1	1
V6	ventral	B1	2	3	0	2	2	1
V6	ventral	B2	3	2	1	1	2	1
V6	ventral	B3	1	4	0	4	1	0
V6	ventral	B4	4	1	1	1	3	0
V7	ventral	B1	1	4	0	3	1	1
V7	ventral	B2	1	4	1	1	0	3
V7	ventral	B3	4	1	1	1	3	0
V7	ventral	B4	2	3	1	2	1	1
V8	ventral	B1	2	3	1	2	1	1
V8	ventral	B2	3	2	1	1	2	1
V8	ventral	B3	5	0	2	0	3	0
V8	ventral	B4	4	1	2	1	2	0
V9	ventral	B1	3	2	2	1	1	1
V9	ventral	B2	3	2	1	1	2	1
V9	ventral	B3	4	1	2	1	2	0
V9	ventral	B4	5	0	2	0	3	0
M1	mixed	B1	3	2	1	2	2	0
M1	mixed	B2	1	4	0	3	1	1
M1	mixed	B3	3	2	0	2	3	0
M1	mixed	B4	3	2	0	2	3	0
M2	mixed	B1	2	3	1	1	1	2
M2	mixed	B2	1	4	1	3	0	1
M2	mixed	B3	3	2	1	1	2	1
M2	mixed	B4	3	2	0	2	3	0
M3	mixed	B1	3	2	1	2	2	0
M3	mixed	B2	3	2	0	2	3	0
M3	mixed	B3	3	2	1	2	2	0
M3	mixed	B4	3	2	1	1	2	1
M4	mixed	B1	2	3	1	1	1	2
M4	mixed	B2	3	2	1	1	2	1
M4	mixed	B3	2	3	0	3	2	0
M4	mixed	B4	2	3	0	3	2	0
M5	mixed	B1	4	1	3	0	1	1
M5	mixed	B2	3	2	0	2	3	0
M5	mixed	B3	4	1	1	1	3	0
M5	mixed	B4	3	2	1	2	2	0
M6	mixed	B1	4	1	1	1	3	0
M6	mixed	B2	5	0	2	0	3	0
M6	mixed	B3	3	2	2	2	1	0
M6	mixed	B4	3	2	1	1	2	1
M7	mixed	B1	3	2	2	1	1	1
M7	mixed	B2	3	2	2	0	1	2
M7	mixed	B3	4	1	1	1	3	0
M7	mixed	B4	4	1	2	1	2	0
M8	mixed	B1	3	2	2	1	1	1
M8	mixed	B2	5	0	2	0	3	0
M8	mixed	B3	3	2	0	2	3	0
M8	mixed	B4	3	2	1	2	2	0
M9	mixed	B1	2	3	2	1	0	2
M9	mixed	B2	3	2	0	2	3	0
M9	mixed	B3	4	1	2	1	2	0
M9	mixed	B4	3	2	1	1	2	1
